# Supplementary material for: Characterization of Ebinur Lake Virus and Its Human Seroprevalence at the China–Kazakhstan Border
Source: PubMed Central journal article supplement (PMC7002386; doi:10.3389/fmicb.2019.03111), 2020-01-30
Supplement: Data_Sheet_1.pdf [file Data_Sheet_1.pdf]

## *Supplementary Material*

### Supplementary Tables:

**Supplementary Table 1.** The background information for viruses used for phylogenetic analyses in this study

| Genus                  | Serogroup  | Viruses                     | Strain          | Accession No.                     |      |                      |              |              |              |
|------------------------|------------|-----------------------------|-----------------|-----------------------------------|------|----------------------|--------------|--------------|--------------|
|                        |            |                             |                 | Location                          | Date | Isolated source      | S            | M            | L            |
|                        |            | Ebinur lake orthobunyavirus | Cu20-XJ         | China: Xinjiang                   | 2013 | Culex modestus       | KJ710424     | KJ710423     | KJ710425     |
|                        |            | Anadyr virus                | LEIV<br>13395Mg | NA                                | 1989 | NA                   | MH48428<br>1 | MH48428<br>0 | MH48427<br>9 |
| <i>Orthobunyavirus</i> | Bunyamwera | Batai virus                 | ZJ2014          | China: Zhejiang                   | 2014 | duck                 | KU746869     | KU746870     | KU746871     |
|                        |            | Birao virus                 | DakArB<br>2198  | Central African Republic: Banugui | 1969 | Anopheles pharoensis | MH37082<br>3 | MH37082<br>2 | MH37082<br>1 |
|                        |            | Bozo virus                  | DakArB<br>7343  | Central African Republic: Bozo    | 1975 | Aedes opok           | MH37082<br>6 | MH37082<br>5 | MH37082<br>4 |

---

|                    |           |                       |      |                         |           |           |           |
|--------------------|-----------|-----------------------|------|-------------------------|-----------|-----------|-----------|
| Bunyamwera virus   | prototype | Uganda                | 1946 | mosquito                | NC_001927 | NC_001926 | NC_001925 |
| Cache Valley virus | 6V633     | USA                   | 1955 | Culiseta inornata       | KX100133  | KX100134  | KX100135  |
| Fort Sherman virus | 86MSP18   | Panama                | 1985 | human serum             | MH484296  | MH484295  | MH484294  |
| Germiston virus    | NA        | Uganda                | 1968 | rodents/<br>mosquito    | M19420    | M21951    | NA        |
| Ilesha virus       | R5964     | NA                    | NA   | NA                      | KF234073  | KF234074  | KF234075  |
| Kairi virus        | BeAr8226  | Brazil                | 1957 | Ochlerotatus scapularis | NC_038740 | NC_038739 | NC_038738 |
| Lokern virus       | A 10391   | USA                   | NA   | NA                      | MH484305  | MH484304  | MH484303  |
| Maguari virus      | BeAr 7272 | Brazil: Utinga forest | 1957 | mosquito                | KY910431  | KY910430  | KY910429  |
| Main Drain virus   | 72V2567   | USA: New Mexico       | 1972 | Aedes vexans            | MH484308  | MH484307  | MH484306  |

---

|            |                                  |                |                                           |      |                         |              |              |              |
|------------|----------------------------------|----------------|-------------------------------------------|------|-------------------------|--------------|--------------|--------------|
|            | Ngari virus                      | Adrar          | Mauritania                                | 2010 | small ruminant          | KJ716848     | KJ716849     | KJ716850     |
|            | Northway virus                   | 243            | USA: Alaska,<br>Northway                  | 1971 | Aedes sp.               | MH48431<br>4 | MH48431<br>3 | MH48431<br>2 |
|            | Playas virus                     | 75V3066        | Ecuador                                   | 1975 | Aedes<br>taeniorhynchus | KX100121     | KX100122     | KX100123     |
|            | Potosi virus                     | 89-3380        | USA: Potosi, Missouri                     | 1989 | Aedes<br>albopictus     | MH48432<br>3 | MH48432<br>2 | MH48432<br>1 |
|            | Shokwe virus                     | SAAr 4042      | South Africa: Ndumu,<br>Natal, Shokwe pan | 1962 | Aedes<br>cumminsii      | MH48433<br>2 | MH48433<br>1 | MH48433<br>0 |
|            | Tensaw virus                     | A9-171B        | USA: Baldwin<br>County, Alabama           | 1960 | Anopheles<br>crucians   | MH48433<br>5 | MH48433<br>4 | MH48433<br>3 |
|            | Tlacotalpan virus                | 61D240         | Mexico: Tlacotalpan,<br>Veracruz          | 1961 | Mansonia<br>titillans   | MH48434<br>4 | MH48434<br>3 | MH48434<br>2 |
| California | California<br>encephalitis virus | BFS 283        | USA: California                           | 1943 | Aedes dorsalis          | KX817314     | KX817313     | KX817312     |
|            | Keystone virus                   | AVA170944<br>1 | USA: Orange county,<br>Texas              | 2017 | Culex sp.               | MG76547<br>1 | MG76547<br>0 | MG76546<br>9 |

---

|         |                      |              |                           |      |                              |           |           |           |
|---------|----------------------|--------------|---------------------------|------|------------------------------|-----------|-----------|-----------|
|         | Inkoo virus          | LEIV-15248Iv | Russia: Ivanovo district  | 1973 | Aedes sp.                    | KT288271  | KT288270  | KT288269  |
|         | Serra do Navio virus | BeAr 103645  | Brazil: Ampa              | 1966 | Aedes fulvus                 | KX817335  | KX817334  | KX817333  |
|         | La Crosse virus      | Human/78     | NA                        |      | human                        | NC_004110 | NC_004109 | NC_004108 |
|         | San Angelo virus     | 20230        | USA: Texas                | 1958 | Anopheles pseudopunctipennis | KX817332  | KX817331  | KX817330  |
|         | Snowshoe hare virus  | original     | USA: Montana              | 1959 | hare brain                   | EU294510  | EU262553  | EU203678  |
|         | South River virus    | NJO-94F      | USA: New Jersey           | 1960 | Anopheles crucians           | KX817338  | KX817337  | KX817336  |
|         | Tahyna virus         | XJ0708       | China: Xinjiang           | 2007 | Aedes vexans                 | HM243139  | HM243138  | HM243137  |
|         | Trivittatus virus    | AR42         | USA: Denton County, Texas | 2016 | Aedes trivittatus            | KX891323  | KX891322  | KX891321  |
| Group C | Caraparu virus       | BeAn3994     | Brazil                    | 1956 | Sapajus apella               | MG029274  | MG029273  | MG029272  |

---

|          |                     |           |                                 |      |                          |               |               |               |
|----------|---------------------|-----------|---------------------------------|------|--------------------------|---------------|---------------|---------------|
|          | Madrid virus        | BT4075    | Panama                          | 1956 | human                    | NC_03449<br>8 | NC_03450<br>5 | NC_03449<br>7 |
|          | Marituba virus      | BeAn15    | Brazil                          | 1954 | Sapajus apella           | MG02928<br>3  | MG02928<br>2  | MG02928<br>1  |
|          | Oriboca virus       | BeAn17    | Brazil                          | 1954 | Sapajus apella           | MG02929<br>2  | MG02929<br>1  | MG02929<br>0  |
|          | Bimiti virus        | TRVL 8362 | Russian: Trinidad and<br>Tobago | 1955 | Culex spissipes          | NC_03872<br>5 | NC_03872<br>3 | NC_03872<br>4 |
| Guama    | Catu virus          | BeH 151   | Brazil                          | 1955 | human                    | NC_03872<br>6 | NC_03872<br>7 | NC_03872<br>8 |
|          | Guama virus         | BeAn 277  | Brazil                          | 1955 | Cebus apella             | NC_03873<br>7 | NC_03873<br>5 | NC_03873<br>6 |
|          | Buffalo Creek virus | DPP186    | Australia                       | 1982 | Anopheles<br>meraukensis | KJ481927      | KJ481928      | KJ481929      |
| Mapputta | Mapputta virus      | MRM186    | Australia                       | 1960 | Anopheles<br>meraukensis | KJ481921      | KJ481922      | KJ481923      |

|        |                    |             |               |      |                                      |               |               |               |
|--------|--------------------|-------------|---------------|------|--------------------------------------|---------------|---------------|---------------|
|        | Maprik virus       | MK7532      | Australia     | 1966 | Verrallina<br>funerea<br>complex sp. | NC_02628<br>2 | NC_02628<br>3 | NC_02628<br>1 |
|        | Murrumbidgee virus |             | 934 Australia | 1997 | Anopheles<br>annulipes               | NC_02259<br>7 | NC_02259<br>6 | NC_02259<br>5 |
|        | Abras virus        | 75V1183     | Ecuador       | 1974 | Culex<br>paracrybda                  | MH01726<br>9  | MH01728<br>1  | MH01727<br>5  |
|        | Babahoyo virus     | 75V2858     | Ecuador       | 1975 | Culex ocosa                          | MH01727<br>0  | MH01728<br>2  | MH01727<br>6  |
| Patois | Patois virus       | 63A49       | Mexico        | 1963 | Culex sp.                            | MH01727<br>3  | MH01728<br>3  | MH01727<br>7  |
|        | Shark river virus  | 64U80       | Mexico        | 1964 | sentinel hamster                     | MH01727<br>1  | MH01728<br>4  | MH01727<br>8  |
|        | Akabane virus      | OBE-1       | Japan:Okayama | 1974 | Bovine fetus                         | NC_00989<br>6 | NC_00989<br>5 | NC_00989<br>4 |
| Simbu  | Jatobal virus      | BeAn 423380 | Brazil        | 1984 | Nasua                                | JQ675601      | JQ675602      | JQ675603      |

|                    |                         |                                  |                                                |      |                 |               |               |               |
|--------------------|-------------------------|----------------------------------|------------------------------------------------|------|-----------------|---------------|---------------|---------------|
|                    | Thimiri orthobunyavirus | VRC 66414                        | India: Thimiri, Walljah Tk., N. Arcot District | 1963 | Ardeola grayii  | MH48433<br>8  | MH48433<br>7  | MH48433<br>6  |
|                    | Oropouche virus         | OROV/EC/E smeraldas/08<br>7/2016 | Ecuador                                        | 2016 | human           | MF926352      | MF926353      | MF926354      |
|                    | Sathuperi virus         | BH80/11-4                        | NA                                             | 2011 | NA              | NC_01846<br>2 | NC_01846<br>6 | NC_01846<br>1 |
|                    | Shamonda virus          | Ib An 5550                       | NA                                             | NA   | NA              | NC_01846<br>4 | NC_01846<br>7 | NC_01846<br>3 |
|                    | Aino virus              | 38K                              | NA                                             | NA   | NA              | NC_01846<br>0 | NC_01845<br>9 | NC_01846<br>5 |
|                    | Simbu virus             | SA Ar 53                         | NA                                             | NA   | NA              | NC_01847<br>7 | NC_01847<br>8 | NC_01847<br>6 |
| Herbert herbevirus | Herbert virus           | F23/CI/2004                      | Cote d'Ivoire                                  | 2004 | Culex nebulosus | NC_03871<br>2 | NC_03871<br>3 | NC_03871<br>4 |

**Supplementary Table 2.** Putative reassortment/recombination event of the M segment among EBIV and members of Bunyamwera serogroup, predicted by RDP software v. 4.74

|                                                   |                             |          |
|---------------------------------------------------|-----------------------------|----------|
| Recombinant *                                     | Ebinur lake orthobunyavirus |          |
| Event                                             | 2                           |          |
| Initial Breakpoint Position                       | 1584                        |          |
| Ending Breakpoint Position                        | 1800                        |          |
| Genomic segment                                   | M                           |          |
| Minor parent                                      | Unknown (Birao virus)       |          |
| Major parent                                      | Northway virus              |          |
| P-values determined<br>by different<br>algorithms | RDP                         | 8.359E-3 |
|                                                   | Bootscan                    | 2.373E-4 |
|                                                   | MaxChi                      | 6.333E-3 |
|                                                   | Chimaera                    | 2.658E-2 |

\* Possible misidentification of the recombinant was suggested by the software

\*\* Statistical analysis was performed at an highest acceptable P-value of 0.05



**Supplementary Figures:**

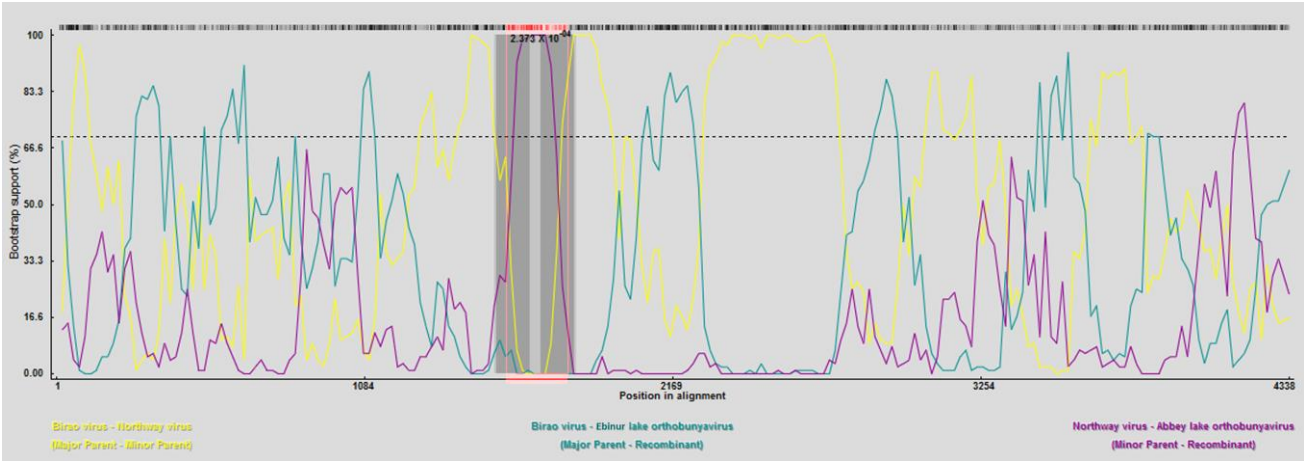

**Supplementary Figure 1.** Diagram for Putative recombination event of EBIV.

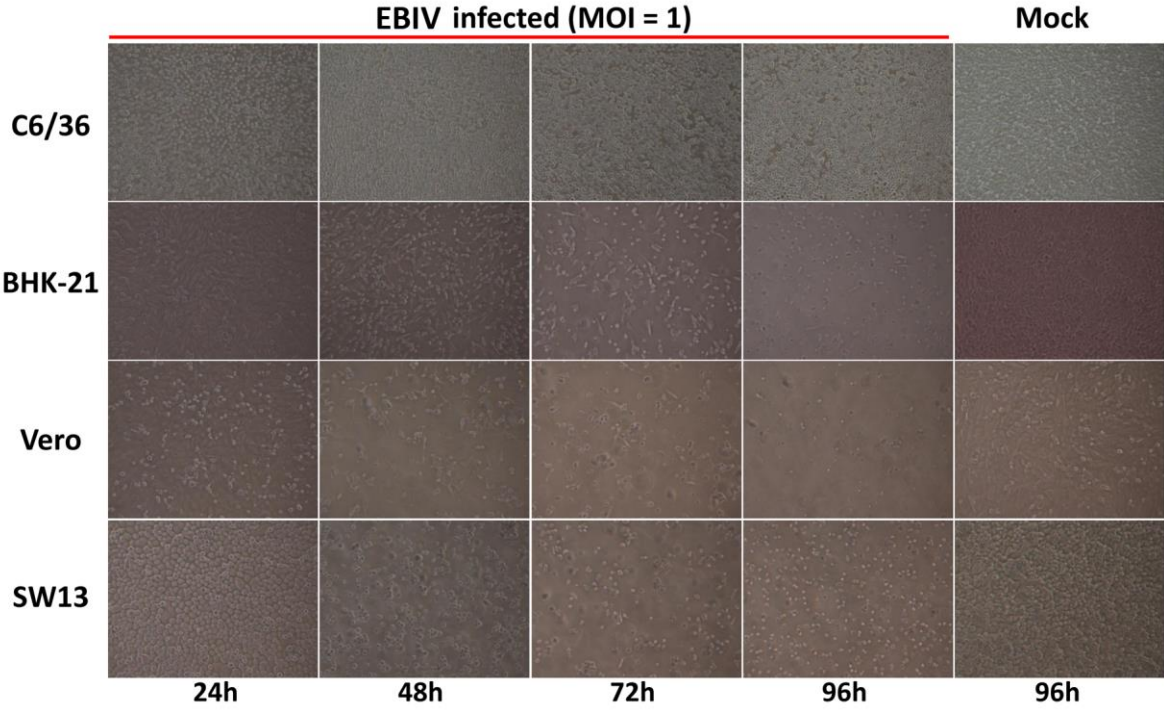

**Supplementary Figure 2.** Strong cytopathic effect observed in EBIV infected BHK-21, Vero, and SW13 cells

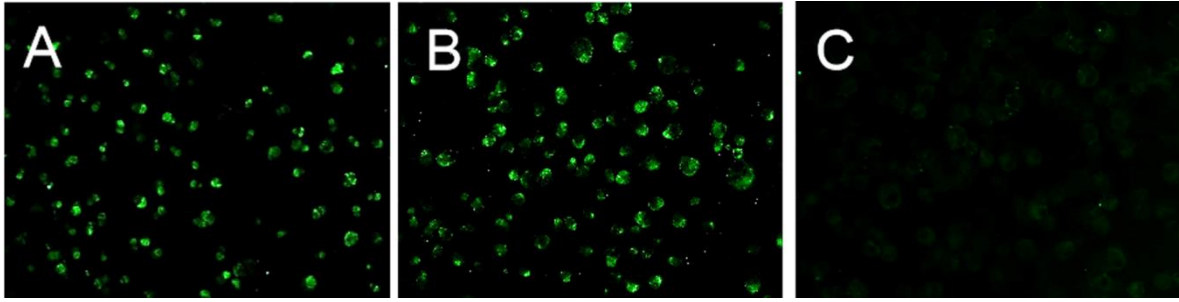

**Supplementary Figure 3.** Indirect Immunofluorescence assay for EBIV antibody in human serum. (A) IgM positive (B) IgG positive, and (C) negative control.
